# Supplementary material for: Stop codon readthrough alters the activity of a POU/Oct transcription factor during Drosophila development
Source: PubMed Central journal article supplement (PMC8417969; doi:10.1186/s12915-021-01106-0), 2021-09-03
Supplement: 12915_2021_1106_MOESM2_ESM.pdf [file 12915_2021_1106_MOESM2_ESM.pdf]

a

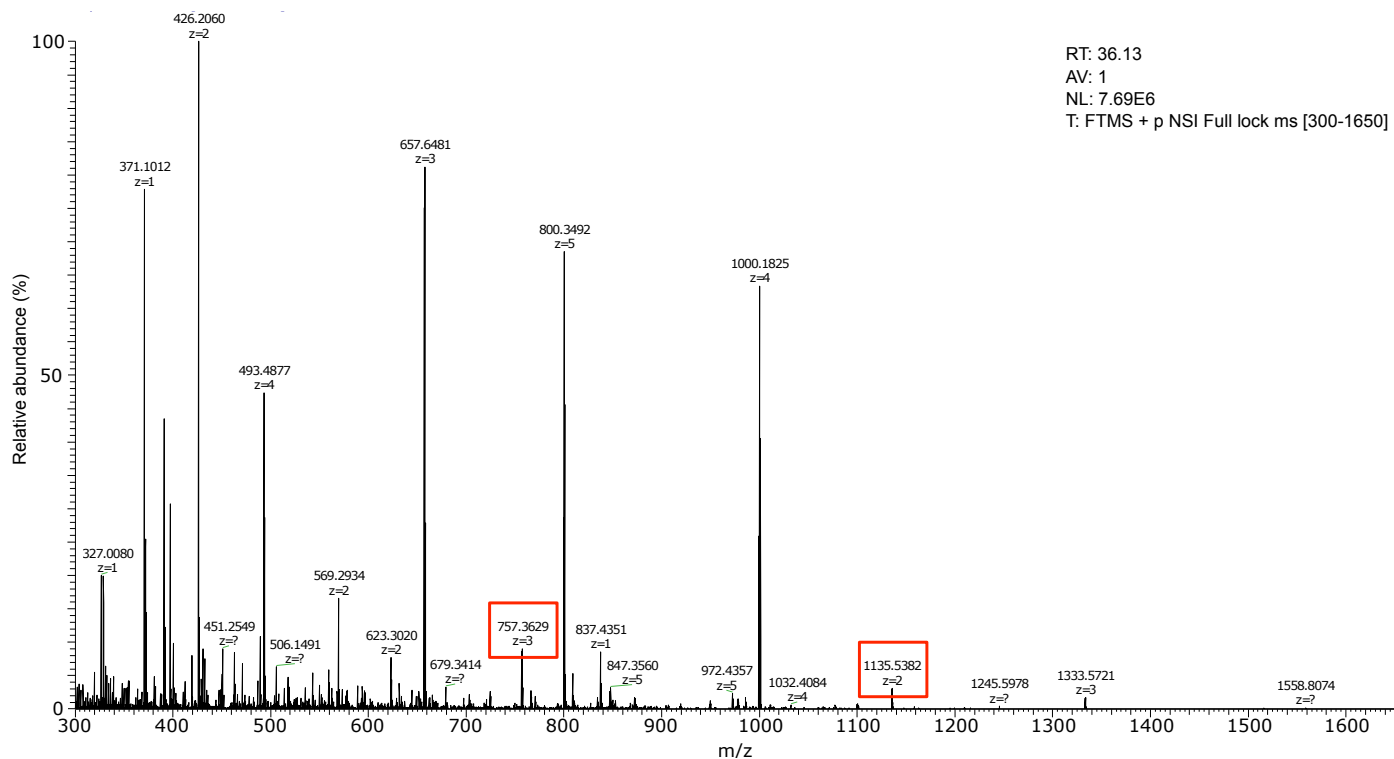

b

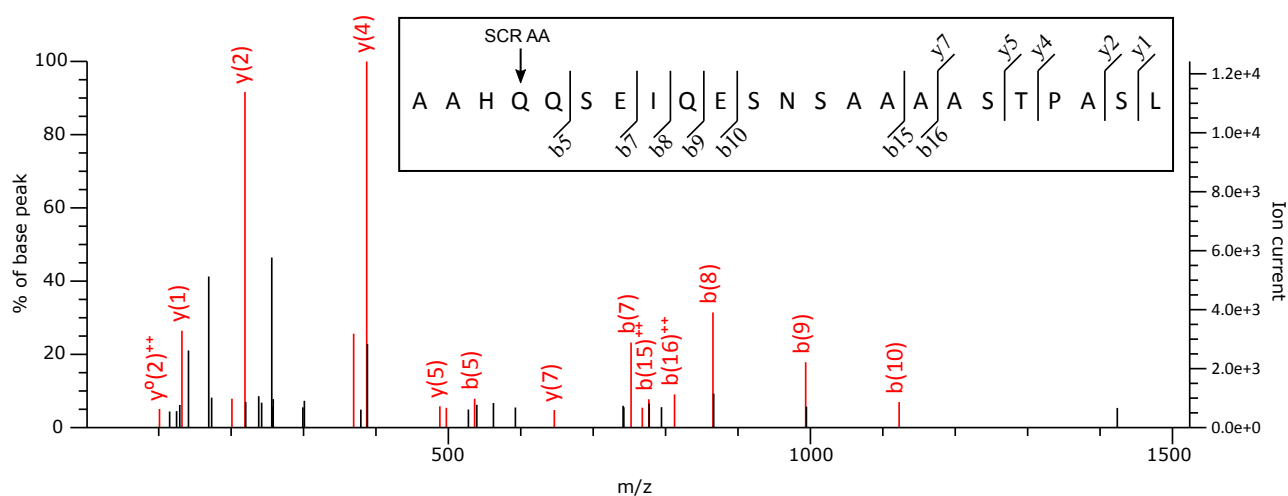

c

| Dfr matched peptides        | Observed  | Mr(expt)  | Mr(calc)  | ppm   | Miss | Score | Expect  | Rank | Unique |
|-----------------------------|-----------|-----------|-----------|-------|------|-------|---------|------|--------|
| F.KNMCKL.K                  | 405.2039  | 808.3932  | 808.3935  | -0.32 | 0    | 17    | 0.022   | 1    | U      |
| Y.MDPMRY.Q                  | 422.6699  | 843.3252  | 843.3255  | -0.3  | 0    | 20    | 0.01    | 1    | U      |
| W.SALHPDPW.M                | 461.7245  | 921.4344  | 921.4345  | -0.02 | 1    | 22    | 0.006   | 1    | U      |
| Y.APTGGSPQLY.H              | 495.7487  | 989.4828  | 989.4818  | 1.05  | 1    | 28    | 0.0015  | 1    | U      |
| F.SQTTICRF.E                | 506.748   | 1011.4814 | 1011.4808 | 0.67  | 0    | 30    | 0.00095 | 1    | U      |
| F.GAAAAPGAVRHF.N            | 562.8019  | 1123.5892 | 1123.5887 | 0.52  | 0    | 22    | 0.0064  | 1    | U      |
| F.GAAAAPGAVRHF.N            | 375.5372  | 1123.5898 | 1123.5887 | 0.98  | 0    | (14)  | 0.039   | 1    | U      |
| L.QLEKEVVRVW.F              | 429.2471  | 1284.7195 | 1284.719  | 0.36  | 1    | 22    | 0.0062  | 1    | U      |
| L.QLEKEVVRVW.F              | 478.271   | 1431.7912 | 1431.7874 | 2.61  | 2    | 11    | 0.081   | 1    | U      |
| F.HKQPKPSAQEITSL.A          | 521.955   | 1562.8432 | 1562.8416 | 0.99  | 0    | 18    | 0.016   | 1    | U      |
| W.HAPHAGHYAPTGGSP.L         | 523.9239  | 1568.7499 | 1568.7484 | 0.92  | 1    | 26    | 0.0027  | 1    | U      |
| Y.MTPPSGDLDMALGGGY.H        | 835.8563  | 1669.698  | 1669.6964 | 0.99  | 2    | 19    | 0.012   | 1    | U      |
| L.SQTRIQQGMASPHAAW.H        | 638.3087  | 1911.9043 | 1911.901  | 1.73  | 0    | 0     | 0.99    | 1    | U      |
| F.HKQPKPSAQEITSLADSL.Q      | 650.6819  | 1949.0239 | 1949.0218 | 1.08  | 1    | 11    | 0.074   | 1    | U      |
| L.AAHQQSEIQESNSAAAASTPASL.N | 1135.0372 | 2268.0598 | 2268.0618 | -0.85 | 0    | (27)  | 0.0022  | 1    | U      |
| L.AAHQQSEIQESNSAAAASTPASL.N | 757.0289  | 2268.0649 | 2268.0618 | 1.36  | 0    | 45    | 3E-05   | 1    | U      |
| Y.MDPMRY.Q +2 oxidation (M) | 422.6699  | 843.3252  | 843.3255  | -0.3  | 0    | 20    | 0.01    | 1    | U      |
