# Supplementary material for: Stop codon readthrough alters the activity of a POU/Oct transcription factor during Drosophila development
Source: PubMed Central journal article supplement (PMC8417969; doi:10.1186/s12915-021-01106-0), 2021-09-03
Supplement: 12915_2021_1106_MOESM4_ESM.pdf [file 12915_2021_1106_MOESM4_ESM.pdf]

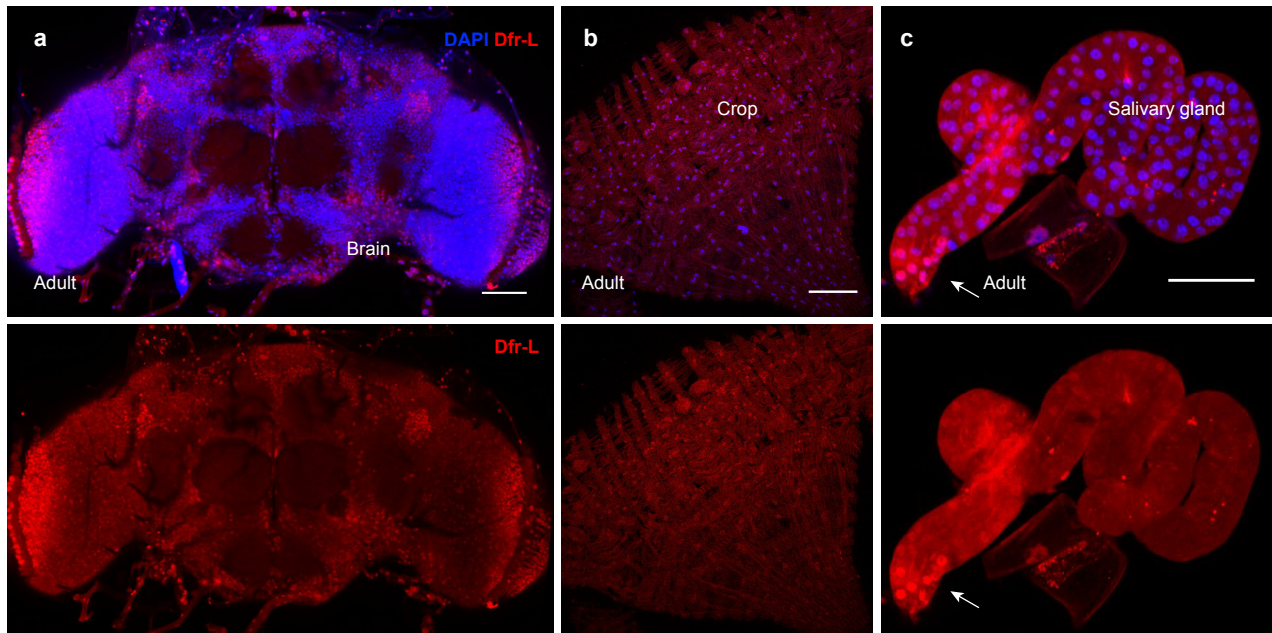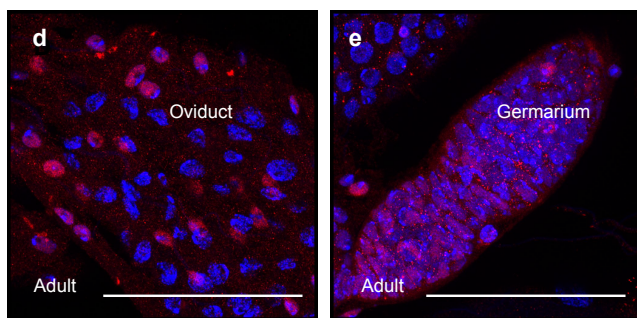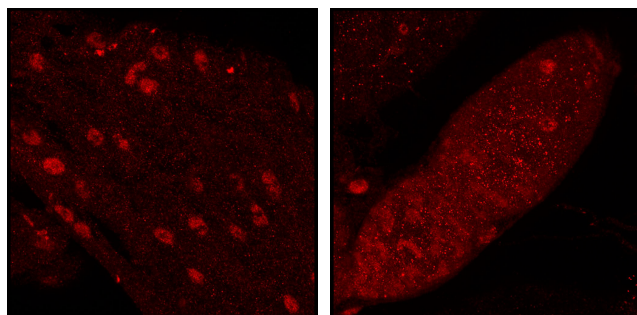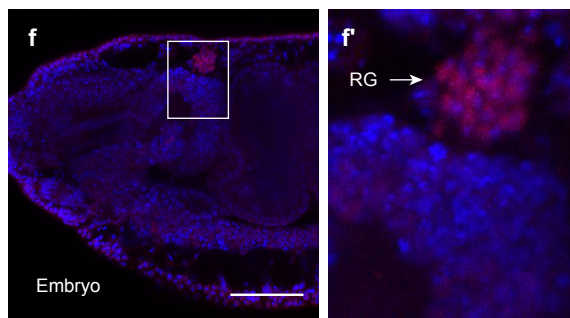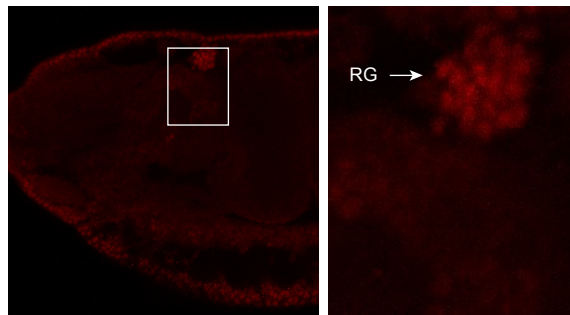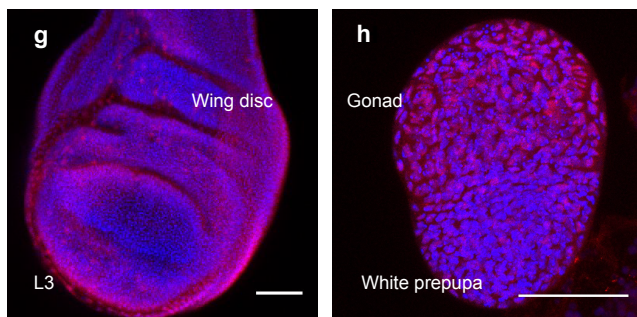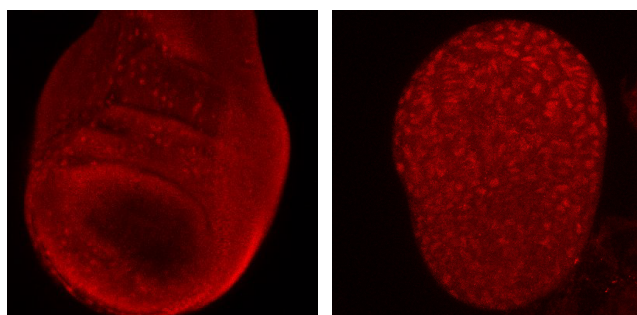

| i                    | anti-Dfr-S/L      |                  | anti-Dfr-L        |                  |
|----------------------|-------------------|------------------|-------------------|------------------|
|                      | w <sup>1118</sup> | df <sup>14</sup> | w <sup>1118</sup> | df <sup>14</sup> |
| <b>larva</b>         |                   |                  |                   |                  |
| L1 prothoracic gland | +++               | +++              | +++               | -                |
| L2 prothoracic gland | +++               | +++              | +++               | -                |
| L3 prothoracic gland | +++               | +++              | +++               | -                |
| L1 brain             | ++                | ++               | ++                | -                |
| L2 brain             | ++                | ++               | ++                | -                |
| L3 brain             | +                 | +                | +                 | -                |
| trachea              | ++                | ++               | ++                | -                |
| fat body             | +                 | +                | +                 | -                |
| wing disc            | +                 | +                | +                 | -                |
| <b>adult</b>         |                   |                  |                   |                  |
| ejaculatory duct     | +++               | +++              | +                 | -                |
| testis               | +                 | +                | +                 | -                |
| ovary                | +                 | +                | +                 | -                |
| trachea              | ++                | ++               | -                 | -                |
| fat body             | ++                | ++               | ++                | -                |
| oenocyte             | +++               | +++              | ++                | +/-              |
| crop                 | +                 | +                | +                 | -                |
| salivary gland       | ++                | ++               | +                 | -                |
| ureter               | ++                | ++               | -                 | -                |
| brain                | ++                | ++               | ++                | +/-              |
| malpighian tubes     | +                 | +                | +                 | -                |
