# Supplementary material for: Stop codon readthrough alters the activity of a POU/Oct transcription factor during Drosophila development
Source: PubMed Central journal article supplement (PMC8417969; doi:10.1186/s12915-021-01106-0), 2021-09-03
Supplement: 12915_2021_1106_MOESM8_ESM.pdf [file 12915_2021_1106_MOESM8_ESM.pdf]

**a**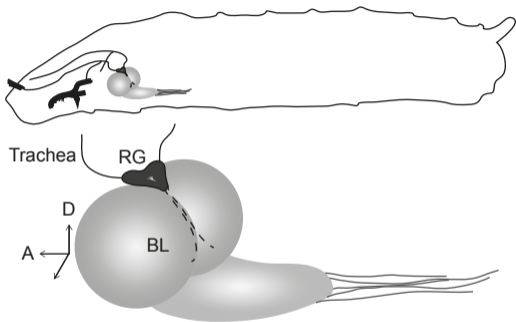**b**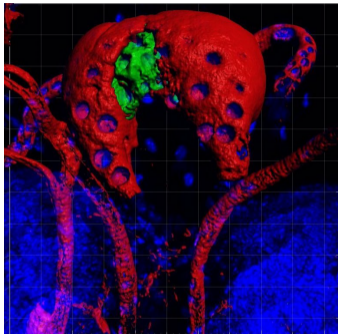

Additional file 8
